# Supplementary material
Source: PubMed Central journal article supplement (PMC7387294)
Supplement: 41375_2020_914_MOESM1_ESM.pdf [file 41375_2020_914_MOESM1_ESM.pdf]

## **Supplementary information**

Response to “COVID-19 in persons with haematological cancers”

Stefan Hatzl et al.

- Statistical methods
- Supplementary Table 1. Baseline characteristics of the study population (N=78).
- Supplementary Figure 1. Overall survival of the study population - Kaplan-Meier curves displaying hematologic versus non-hematologic patients (N=78).

**Statistical methods**

Patient data cut off for statistical analyses was May 12, 2020. All statistical analyses were performed using SPSS 23.0 (SPSS Inc., Chicago, IL, USA) and R 3.6.1 (<https://www.r-project.org/>), respectively. All statistical tests were performed two-sided, and a P-value of <0.05 was considered statistically significant.

Kruskal-Wallis test was used for comparison of serum ferritin, interleukin-6 as well as C-reactive protein between hematologic and non-hematologic patients. Count data and continuous variables of baseline characteristic were compared using ranksum-tests, Fisher's exact tests, and  $\chi^2$ -tests, as appropriate.

Co-primary outcomes included risk of SARS-CoV-2 qRT-PCR (quantitative reverse transcription polymerase chain reaction) negativity and overall survival. Overall survival was analyzed with Kaplan-Meier estimators and log-rank tests whereas risk of SARS-CoV-2 qRT-PCR negativity was analyzed with competing risk cumulative incidence estimators, Gray's tests (1).

**Reference:**

- (1) Dignam JJ, Kocherginsky MN. Choice and interpretation of statistical tests used when competing risks are present. *J Clin Oncol.* 2008;26(24):4027-4034. doi:10.1200/JCO.2007.12.9866

**Supplementary Table 1**

| Variable                             | N (%missing) | Overall (N=78)   | Hematologic (N=8) | Non-hematologic (N=70) | P-value      |
|--------------------------------------|--------------|------------------|-------------------|------------------------|--------------|
| <b>Demographic</b>                   |              |                  |                   |                        |              |
| Age (years)                          | 78 (0%)      | 69 [55-80]       | 57 [54-60]        | 73 [57-80]             | <b>0.035</b> |
| BMI (kg/m <sup>2</sup> )             | 62 (80%)     | 25.0 [24.3-27.7] | 26.0 [24.3-28.1]  | 24.7 [23.9-27.6]       | 0.597        |
| Male                                 | 78 (0%)      | 37 (47%)         | 4 (50%)           | 33 (47%)               | 0.584        |
| <b>Co-morbidities</b>                |              |                  |                   |                        |              |
| Hypertension                         | 78 (0%)      | 36 (46%)         | 3 (38%)           | 33 (47%)               | 0.719        |
| Diabetes                             | 78 (0%)      | 13 (16%)         | 1 (13%)           | 12 (17%)               | 0.601        |
| Atrial fibrillation                  | 78 (0%)      | 15 (19%)         | 1 (13%)           | 13 (18%)               | 0.427        |
| Coronary heart disease               | 78 (0%)      | 14 (13%)         | 1 (13%)           | 13 (19%)               | 0.560        |
| Cardiomyopathy of any cause          | 78 (0%)      | 8 (10%)          | 0 (0%)            | 8 (11%)                | 0.403        |
| Vascular disease                     | 78 (0%)      | 8 (10%)          | 1 (13%)           | 7 (10%)                | 0.597        |
| Prior thromboembolic event           | 78 (0%)      | 5 (7%)           | 1 (13%)           | 4 (6%)                 | 0.425        |
| Chronic hemodialysis                 | 78 (0%)      | 5 (7%)           | 0 (0%)            | 5 (7%)                 | 0.573        |
| COPD                                 | 78 (0%)      | 6 (8%)           | 1 (13%)           | 5 (7%)                 | 0.490        |
| Lung disease of other cause          | 78 (0%)      | 4 (5%)           | 0 (0%)            | 4 (6%)                 | 0.643        |
| Prior solid cancer                   | 78 (0%)      | 5 (7%)           | 1 (13%)           | 4 (6%)                 | 0.427        |
| Active solid cancer                  | 78 (0%)      | 6 (8%)           | 0 (0%)            | 6 (9%)                 | 0.520        |
| Dementia                             | 78 (0%)      | 10 (13%)         | 0 (0%)            | 10 (14%)               | 0.310        |
| <b>Outcomes</b>                      |              |                  |                   |                        |              |
| ARDS (any grade)                     | 78 (0%)      | 33 (42%)         | 3 (38%)           | 30 (43%)               | 0.310        |
| ICU admission                        | 78 (0%)      | 21 (27%)         | 3 (38%)           | 18 (26%)               | 0.368        |
| Duration of ICU stay (days)          | 21 (0%)      | 17 [4.0-18.0]    | 20 [19.0-22.0]    | 10 [4.0-17.8]          | 0.080        |
| Time to ICU admission (days)         | 21 (0%)      | 3 [0.0-7.0]      | 6 [5.5-7.0]       | 2 [0.0-7.0]            | 0.262        |
| Deceased at data cut of May 12, 2020 | 78 (0%)      | 19 (24%)         | 1 (13%)           | 18 (26%)               | 0.371        |

**Supplementary Table 1. Baseline characteristics of the study population (n=78).** Data are reported as medians [25<sup>th</sup>-75<sup>th</sup> percentile] for continuous variables and absolute frequencies (%) for count data. N (% miss.) reports the number of patients with fully observed data (% missing). Abbreviations: BMI – Body Mass Index, COPD – chronic obstructive lung disease, ARDS – acute respiratory distress syndrome, ICU – intensive care unit.

**Supplementary Figure 1**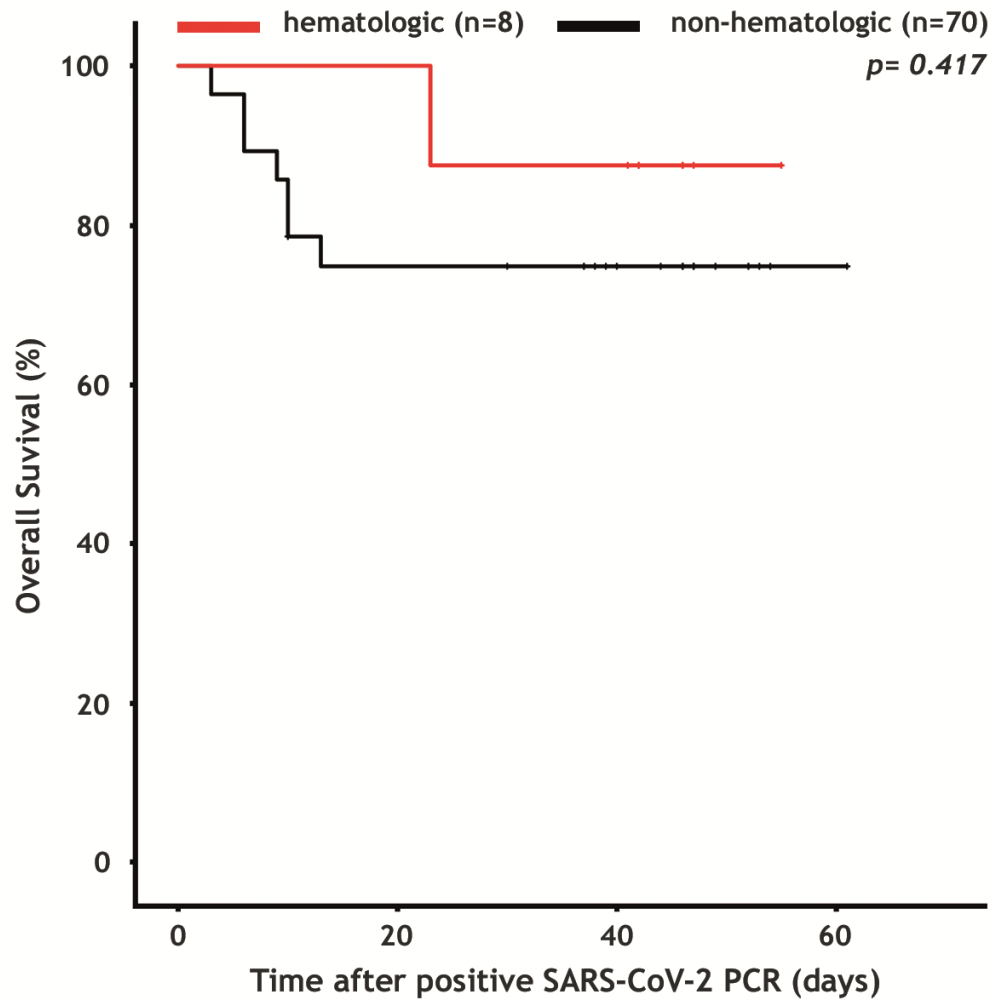

**Supplementary Fig. 1 Overall survival of the study population - Kaplan-Meier curves displaying hematologic versus non-hematologic patients (N=78). Red line - hematologic patients, black line - non-hematologic patients.**
